# Supplementary material
Source: publisher figshare collection journal article supplement (https://springernature.figshare.com/ndownloader/files/13103321)
Supplement: Supplementary file 1 [file 13103321]

Additional File: Citations of 43 studies included on subject, intervention and outcome, but excluded on comparator and/or study design

1. Arkema KK, Verutes GM, Wood S, Clarke-Samuels C, Rosado S, Canto M, et al. Embedding ecosystem services in coastal planning leads to better outcomes for people and nature. *Proc. Natl. Acad. Sci.* 2015;112:7390–5.
2. Barr LM, Possingham HP. Are outcomes matching policy commitments in Australian marine conservation planning? *Mar. Policy.* 2013;42:39–48.
3. Blau J, Green L. Assessing the impact of a new approach to ocean management: Evidence to date from five ocean plans. *Mar. Policy.* 2015;56:1–8.
4. Bottrill MC, Mills M, Pressey RL, Game ET, Groves C. Evaluating perceived benefits of ecoregional assessments. *Conserv. Biol.* 2012;26:851–61.
5. Brownlie S, De Villiers C, Driver A, Job N, Von Hase A, Maze K. Systematic conservation planning in the Cape Floristic Region and Succulent Karoo, South Africa: Enabling sound spatial planning and improved environmental assessment. *J. Environ. Assess. Policy Manag.* 2005;7:201–28.
6. Cabral R, Mamauag S, Alino P. Designing a marine protected areas network in a data-limited situation. *Mar. Policy.* 2015;59:64–76.
7. Day J. The need and practice of monitoring, evaluating and adapting marine planning and management—lessons from the Great Barrier Reef. *Mar. Policy.* 2008;32:823–31.
8. Dobbs K, Fernandes L, Slegers S, Jago B, Thompson L, Hall J, et al. Incorporating marine turtle habitats into the marine protected area design for the Great Barrier Reef Marine Park, Queensland, Australia. *Pac. Conserv. Biol.* 2007;13:293–302.
9. Driver A. CEPF final project completion report. Pretoria, South Africa; 2006.
10. Fernandes L, Day J, Lewis A, Slegers S, Kerrigan B, Breen D, et al. Establishing representative no-take areas in the Great Barrier Reef: Large-scale implementation of theory on marine protected areas. *Conserv. Biol.* 2005;19:1733–1744.
11. Game ET, Lipsett-Moore G, Hamilton R, Peterson N, Kerseka J, Atu W, et al. Informed opportunism for conservation planning in the Solomon Islands. *Conserv. Lett.* 2011;4:38–46.
12. Green A, Smith SE, Lipsett-Moore G, Groves C, Peterson N, Sheppard S, et al. Designing a resilient network of marine protected areas for Kimbe Bay, Papua New Guinea. *Oryx.* 2009;43:488–98.
13. Hannah L, Panitz D, Midgley G. Cape floristic region, South Africa. In: Hilty JA, Chester CC, Cross MS, editors. *Clim. Conserv. Landsc. Seascape Sci. Planning, Action.* Washington, D.C.: Island Press-Center for Resource Economics; 2012.
14. von Hase A, Rouget M, Maze K, Helme N. A fine-scale conservation plan for Cape lowlands renosterveld: technical report. Claremont, South Africa; 2003.
15. von Hase A, Rouget M, Cowling RM. Evaluating private land conservation in the cape lowlands, South Africa. *Conserv. Biol.* 2010;24:1182–9.
16. Henson A, Williams D, Dupain J, Gichohi H, Muruthi P. The Heartland Conservation Process: enhancing biodiversity conservation and livelihoods through landscape-scale conservation planning in Africa. *Oryx.* 2009;43:508.
17. Laffoley D, White AT, Kilarski S, Gleason M, Smith S, Llewellyn G, et al. *Establishing Resilient Marine Protected Area Networks — Making It Happen.* Washington, D.C.: The World Conservation Union; 2008.
18. Klein CJ, Jupiter SD, Watts M, Possingham HP. Evaluating the influence of candidate terrestrial protected areas on coral reef condition in Fiji. *Mar. Policy.* Elsevier; 2014;44:360–5.

19. Knight AT, Cowling RM, Boshoff AF, Wilson SL, Pierce SM. Walking in STEP: Lessons for linking spatial prioritisations to implementation strategies. *Biol. Conserv.* 2011;144:202–11.
20. Lipsett-Moore G, Hamilton R, Peterson N, Game E, Atu W, Kereseke J, et al. Ridges to Reefs Conservation Plan for Choiseul Province, Solomon Islands. TNC Pacific Islands Countries Report No. 2/10. 2010.
21. Mangubhai S, Wilson JR, Rumetna L, Maturbongs Y, Purwanto. Explicitly incorporating socioeconomic criteria and data into marine protected area zoning. *Ocean Coast. Manag.* Elsevier Ltd; 2015;116:523–9.
22. Mendel LC, Kirkpatrick JB. Historical progress of biodiversity conservation in the protected-are system of Tasmania, Australia. *Conserv. Biol.* 2002;16:1520–9.
23. Morrison J, Loucks C, Long B, Wikramanayake E. Landscape-scale spatial planning at WWF: a variety of approaches. *Oryx.* 2009;43:499–507.
24. Nel JL, Roux DJ, Driver A, Hill L, Maherry AC, Snaddon K, et al. Knowledge co-production and boundary work to promote implementation of conservation plans. *Conserv. Biol.* 2016;30:176–88.
25. Northern Territory Government. Draft Conservation Plan for the Daly Basin Bioregion. Darwin, Northern Territory; 2003.
26. Nutters HM, Pinto da Silva P. Fishery stakeholder engagement and marine spatial planning: Lessons from the Rhode Island Ocean SAMP and the Massachusetts Ocean Management Plan. *Ocean Coast. Manag.* Elsevier Ltd; 2012;67:9–18.
27. Osmond M, Airame S, Caldwell M, Day J. Lessons for marine conservation planning: A comparison of three marine protected area planning processes. *Ocean Coast. Manag.* 2010;53:41–51.
28. Pence GQK. Western Cape Biodiversity Framework 2014 Status Update: Critical Biodiversity Areas of the Western Cape. Unpublished CapeNature project report. Cape Town, South Africa; 2014.
29. Pence GQK. C.A.P.E. fine-scale systematic conservation planning assessment: Technical report. Produced for CapeNature as part of the GEF-funded C.A.P.E. Fine-Scale Biodiversity Planning Project. Cape Town, South Africa; 2008.
30. Pierce SM, Cowling RM, Knight AT, Lombard AT, Rouget M, Wolf T. Systematic conservation planning products for land-use planning: Interpretation for implementation. *Biol. Conserv.* 2005;125:441–58.
31. Pressey R., Whish G., Barrett T., Watts M. Effectiveness of protected areas in north-eastern New South Wales: recent trends in six measures. *Biol. Conserv.* 2002;106:57–69.
32. Pressey RL, Mills M, Weeks R, Day JC. The plan of the day: Managing the dynamic transition from regional conservation designs to local conservation actions. *Biol. Conserv.* 2013;166:155–69.
33. Ralston S, de Villiers C, Pence GQK, Manuel J, te Roller K. Where are we going? Fine scale systemantic conservation plans and their contribution to environmental assessment. Sanbi. Pretoria, South Africa; 2009.
34. Reyers B, Rouget M, Jonas Z, Cowling RM, Driver A, Maze K, et al. Developing products for conservation decision-making: Lessons from a spatial biodiversity assessment for South Africa. *Divers. Distrib.* 2007;13:608–19.
35. Saenz S, Walschburger T, González JC, León J, McKenney B, Kiesecker J. Development by design in Colombia: Making mitigation decisions consistent with conservation outcomes. *PLoS One.* 2013;8.
36. Smith RJ, Goodman PS, Matthews WS. Systematic conservation planning: A review of perceived limitations and an illustration of the benefits, using a case study from Maputaland, South Africa. *Oryx.* 2006;40:400.

37. Smith R, Leader-Williams N. Transnational conservation planning in the Maputaland ecoregion of southern Africa. Darwin Initiative for the Survival of Species Annual Report. Kent, UK; 2004.
38. Syakur A, Wibowo JT, Firmansyah F, Azam I, Linkie M. Ensuring local stakeholder support for marine conservation: Establishing a locally-managed marine area network in Aceh. *Oryx*. 2012;46:516–24.
39. The World Bank. Implementation completion and results report (TF-53225): ZA-C.A.P.E.: Biodiversity Conservation and Sustainable Development Project. 2011.
40. van Wilgen BW, Carruthers J, Cowling RM, Esler KJ, Forsyth AT, Gaertner M, et al. Ecological research and conservation management in the Cape Floristic Region between 1945 and 2015: History, current understanding and future challenges. *Trans. R. Soc. South Africa*. 2016;71:207–303.
41. Vanaverbeke J, Vincx M, Rockmann C, Jak R, Goldsborough D, Tjalling van der Wal J. Deliverable 3.6 Zoning plan of case studies: Evaluation of spatial management options for the case studies. *Monit. Eval. Spat. Manag. Areas*. Gent, Belgium; 2012.
42. Weeks R, Aliño PM, Atkinson S, Beldia P, Binson A, Campos WL, et al. Developing marine protected area networks in the Coral Triangle: Good practices for expanding the Coral Triangle Marine Protected Area System. *Coast. Manag.* 2014;42:183–205.
43. Zeydanli US, Turak AS, Balkiz O, Ozut D, Erturk A, Welch H, et al. Identification of Prime Butterfly Areas in Turkey using systematic conservation planning: Challenges and opportunities. *Biol. Conserv.* 2012;150:86–93.
